# Supplementary material for: Semi-Lethal Primary Ciliary Dyskinesia in Rats Lacking the Nme7 Gene
Source: MDPI journal article supplement (doi:10.3390/ijms22083810), 2021-04-07
Supplement: s1 [file s1]

*Supplementary Material - Figures*

## **Semi-lethal primary ciliary dyskinesia in rats lacking *Nme7* gene**

**Lucie Šedová <sup>1,2,\*</sup>, Ivana Buková <sup>5</sup>, Pavla Bažantová <sup>2</sup>, Silvia Petrežsélyová <sup>1,5</sup>, Jan Prochazka <sup>5</sup>, Elena Školníková <sup>1,2</sup>, Dagmar Zudová <sup>5</sup>, Josef Včelák <sup>3</sup>, Pavol Makovický <sup>4</sup>, Běla Bendlová <sup>3</sup>, Ondřej Šeda <sup>2</sup> and Radislav Sedlacek <sup>1,5</sup>**

<sup>1</sup> Laboratory of Transgenic Models of Diseases, Institute of Molecular Genetics of the Czech Academy of Sciences, v.v.i., Vestec, Czech Republic;

<sup>2</sup> Institute of Biology and Medical Genetics, the First Faculty of Medicine, Charles University and the General University Hospital, Prague, Czech Republic;

<sup>3</sup> Department of Molecular Endocrinology, Institute of Endocrinology, Prague, Czech Republic;

<sup>4</sup> Department of Biology, Faculty of Education, J. Selye University, Komarno, Slovak Republic;

<sup>5</sup> Czech Centre for Phenogenomics, Institute of Molecular Genetics of the Czech Academy of Sciences, v.v.i., Vestec, Czech Republic;

\* Correspondence: [lucie.sedova@lf1.cuni.cz](mailto:lucie.sedova@lf1.cuni.cz)

# Supplementary Figure S1

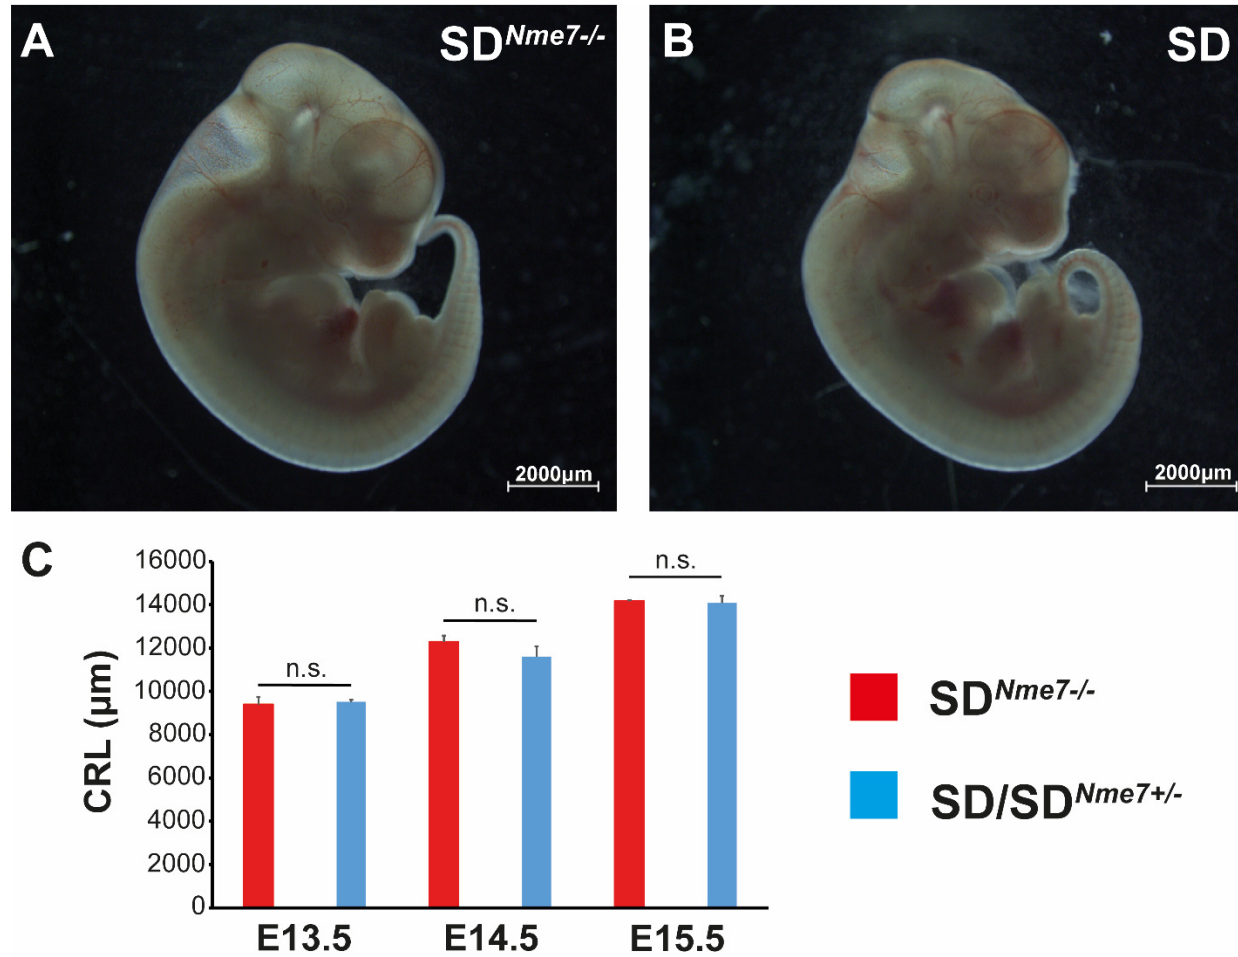

**Figure S1.** Gross morphology of  $SD^{Nme7-/-}$  (A) and  $SD$  embryos (B) at E13.5. C. The crown-to-rump length (CRL) measurement did not show any differences between  $SD^{Nme7-/-}$  and  $SD / SD^{Nme7+/-}$  embryos at E13.5, E14.5, and E15.5.

Supplementary Figure S2

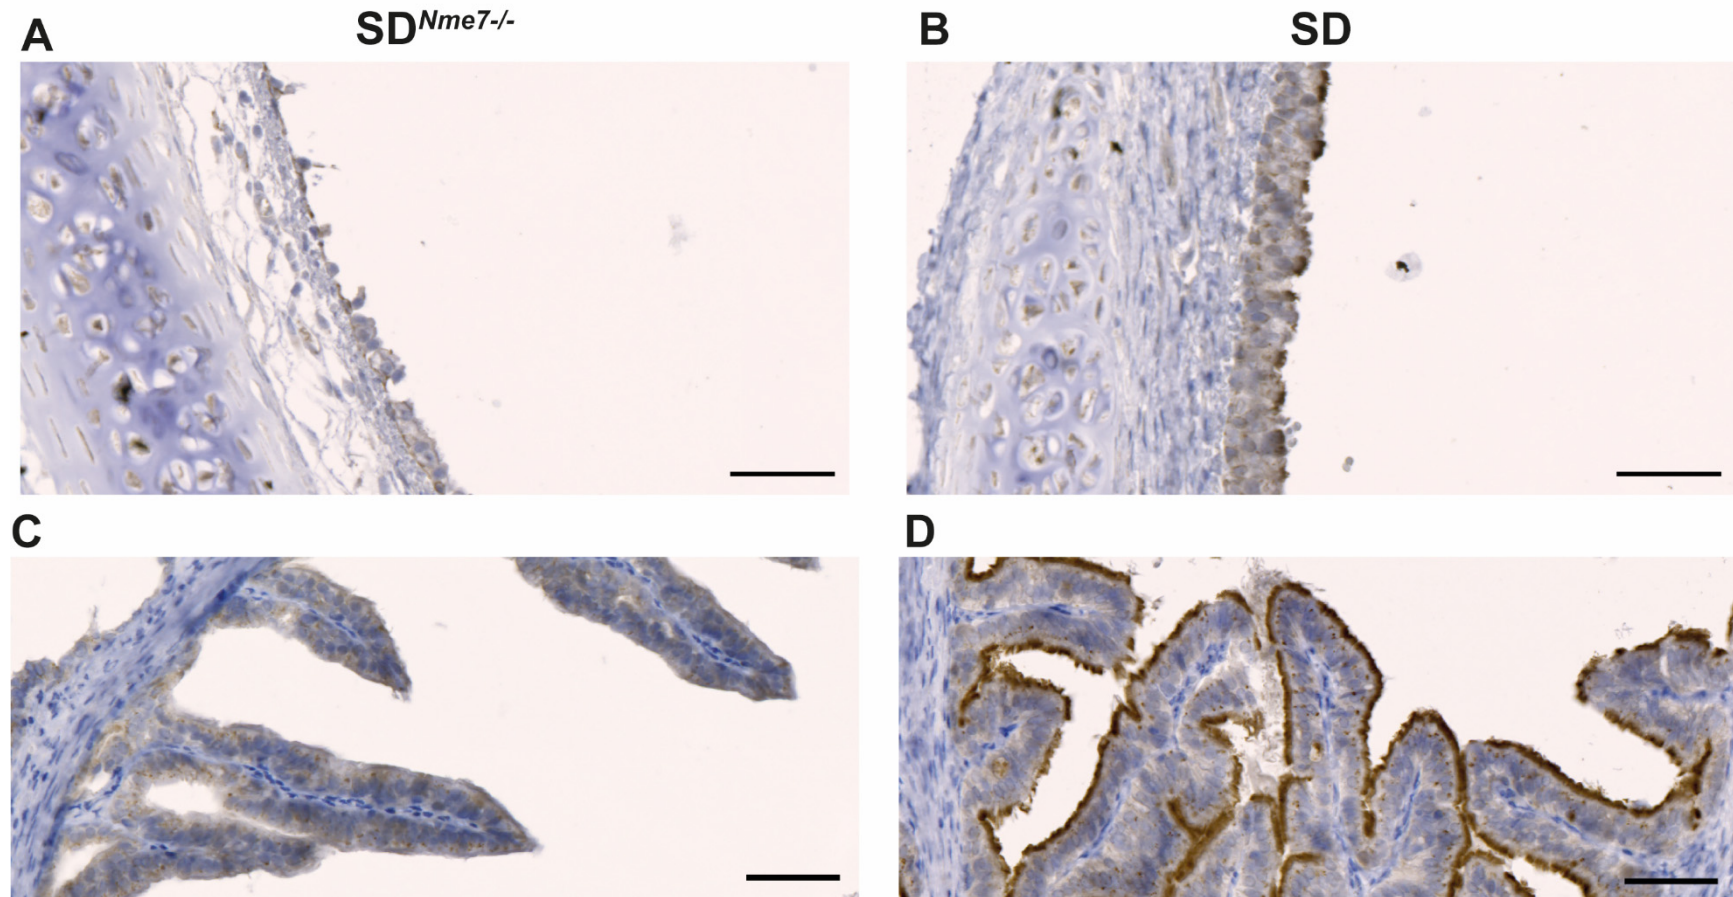

**Figure S2.** Expression of Nme7 was detected using immunohistochemistry in transversally sectioned trachea (**A, B**) and oviduct (**C, D**). In contrast to damaged, almost missing pseudostratified ciliated columnar epithelium in SD<sup>Nme7-/-</sup> (**A**), the Nme7 showed positivity in pseudostratified ciliated columnar epithelium in SD rat (**B**). Transversally sectioned oviduct with folded pseudostratified ciliated epithelium lining showing strong positivity for Nme7 in SD control female rat (**D**), contrasting with damaged pseudostratified ciliated epithelium in SD<sup>Nme7-/-</sup> female rat (**C**). The bars indicate 50  $\mu$ m.

**Supplementary Figure S3**

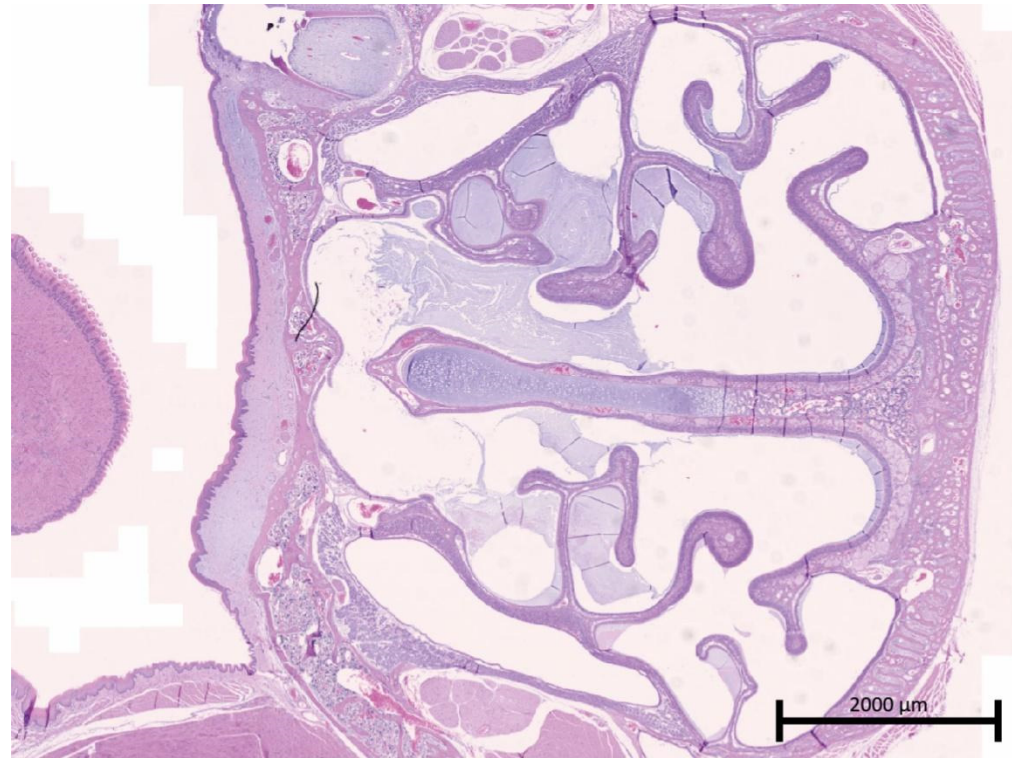

**Figure S3.** Paranasal sinuses (haematoxylin-eosin stained) of  $SD^{Nme7/-}$  rat with mucinous deposits. The bar indicates 2000 µm.



**Supplementary Figure S4**

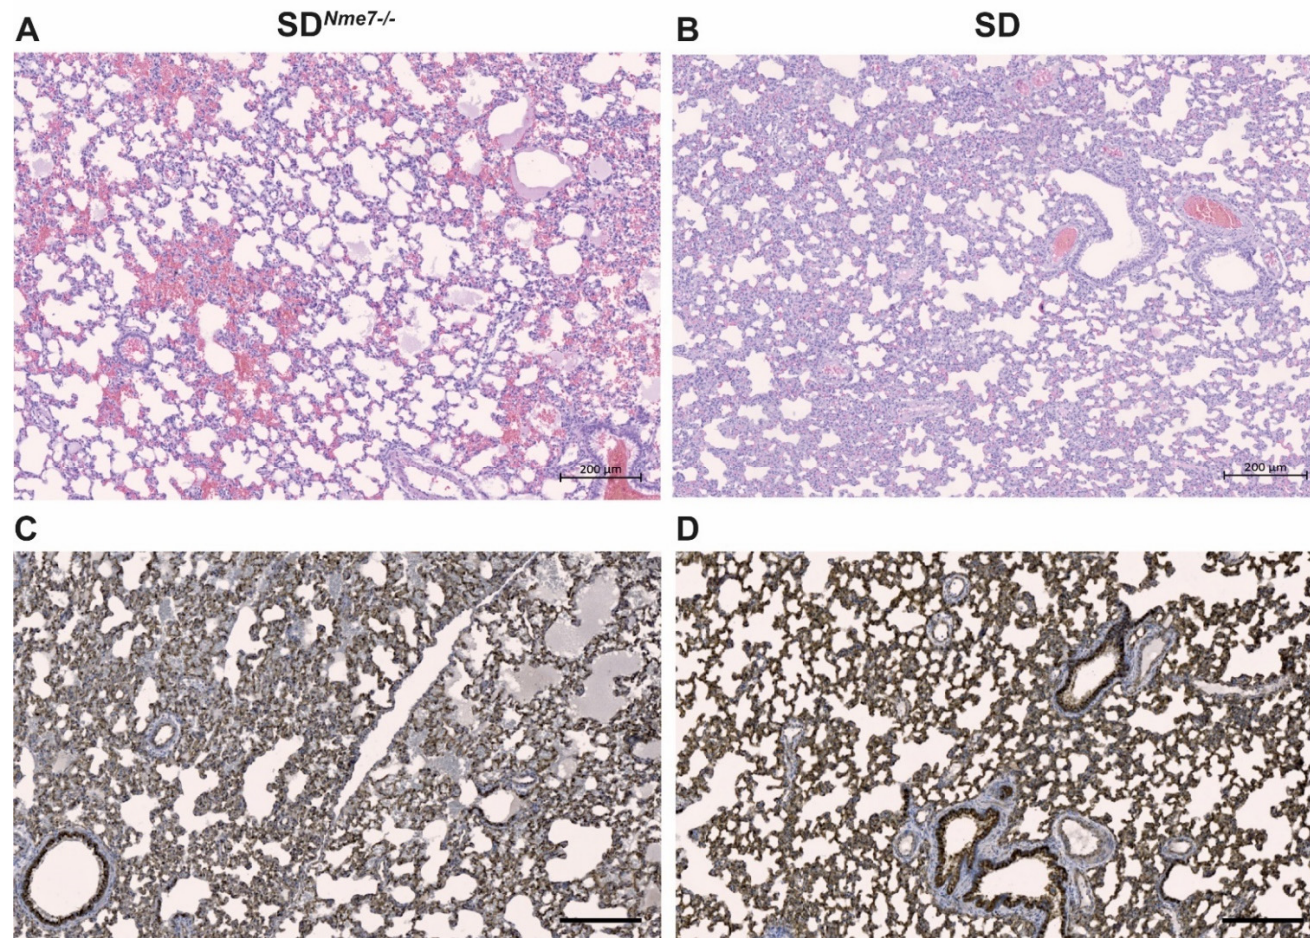

**Figure S4.** Haematoxylin-eosin stained lungs in SD<sup>Nme7-/-</sup> (A) and SD (B) rats. Acetylated- $\alpha$ -tubulin staining of lungs in SD<sup>Nme7-/-</sup> (C) and SD (D) rats. The bars indicate 200  $\mu$ m.

## Supplementary Figure S5

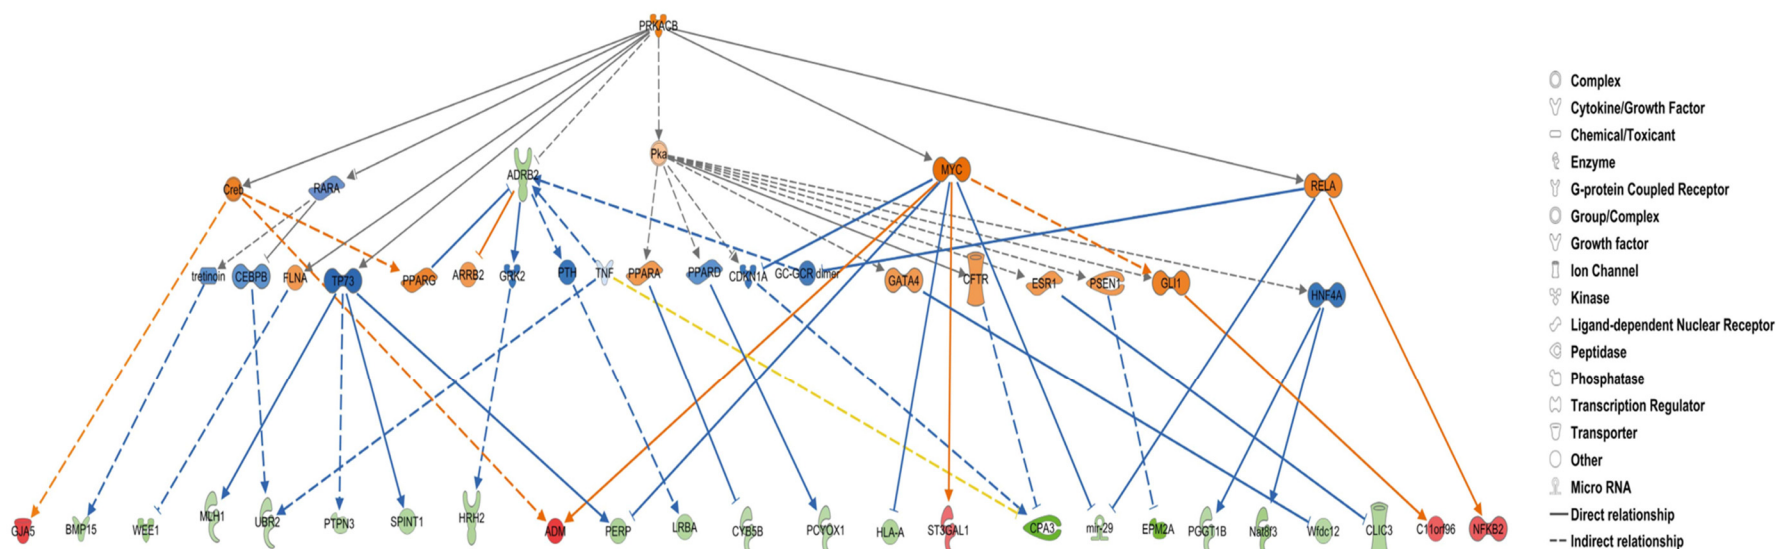

**Figure S5.** Top resulting network from Causal Network Analysis algorithm based on significantly differentially expressed transcripts in the lungs of SD<sup>Nme7-/-</sup> vs. SD rats. Causal network combining several layers of upstream regulators indicating their predicted activation (shades of orange) or inhibition (shades of blue) in the lungs of SD<sup>Nme7-/-</sup> rats compared to their SD littermates. The transcripts significantly differentially expressed between SD<sup>Nme7-/-</sup> and SD are shown in shades of green (downregulation in SD<sup>Nme7-/-</sup>) and shades of red (upregulation in SD<sup>Nme7-/-</sup>). Network was generated using Causal networks Analysis within Ingenuity Pathway Analysis (Qiagen) Advanced Analytics module.

# Supplementary Figure S6

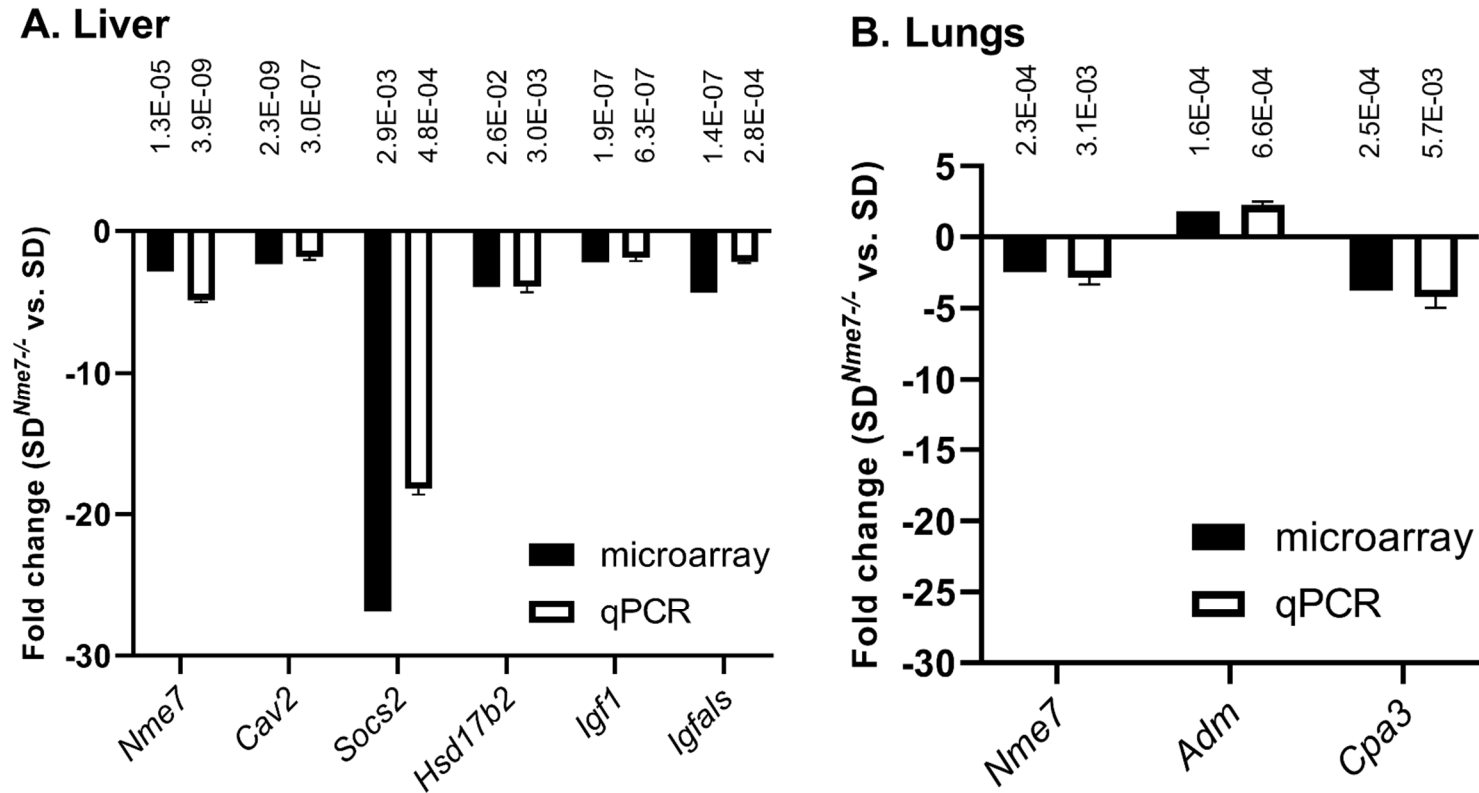

**Figure S6.** Validation of transcriptomic results by qPCR. Fold changes are indicated for comparison of expression between  $SD^{Nme7-/-}$  vs. SD rats (qPCR: blue bars; microarray: red bars) in **A.** liver; **B.** lungs. The microarray fold-change values are shown based on Partek Genomics Suite analysis (see Methods); the qPCR results are expressed as the mean fold-change + standard error of the mean for each transcript. The indicated significance levels correspond to FDR-corrected p-value for microarray (Partek) and the two-sample t-test for qPCR. The gene symbols are used in accordance with the names approved by the HUGO Gene Nomenclature Committee: caveolin 2 (*Cav2*), suppressor of cytokine signaling 2 (*Socs2*), hydroxysteroid 17-beta dehydrogenase 2 (*Hsd17b2*), insulin-like growth factor 1 (*Igf1*), and insulin-like growth factor binding protein acid labile subunit (*Igfals*), adrenomedullin (*Adm*), carboxypeptidase A3 (*Cpa3*).



**Supplementary Figure S7**

**Liver**

**A**

**SD<sup>Nme7-/-</sup>**

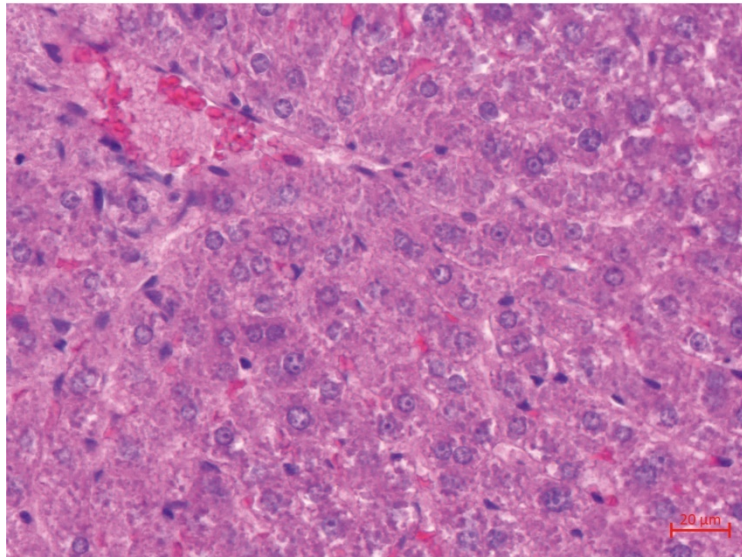

**B**

**SD**

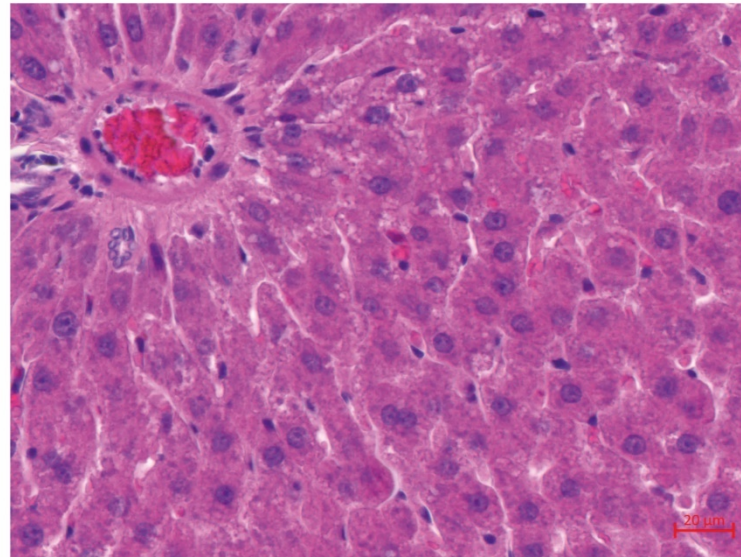

**Figure S7.** Haematoxylin-eosin stained liver in SD<sup>Nme7-/-</sup> (**A**) and SD (**B**) male rats.
